# Supplementary material for: Analysis of membrane proteins localizing to the inner nuclear envelope in living cells
Source: PubMed Central journal article supplement — J Cell Biol. 2016 Nov 21;215(4):575–90. doi: 10.1083/jcb.201607043 (PMC5119940; doi:10.1083/jcb.201607043), 2016-11-21
Supplement: JCB_201607043_sm.pdf [file JCB_201607043_sm.pdf]

Smoyer et al., <https://doi.org/10.1083/jcb.201607043>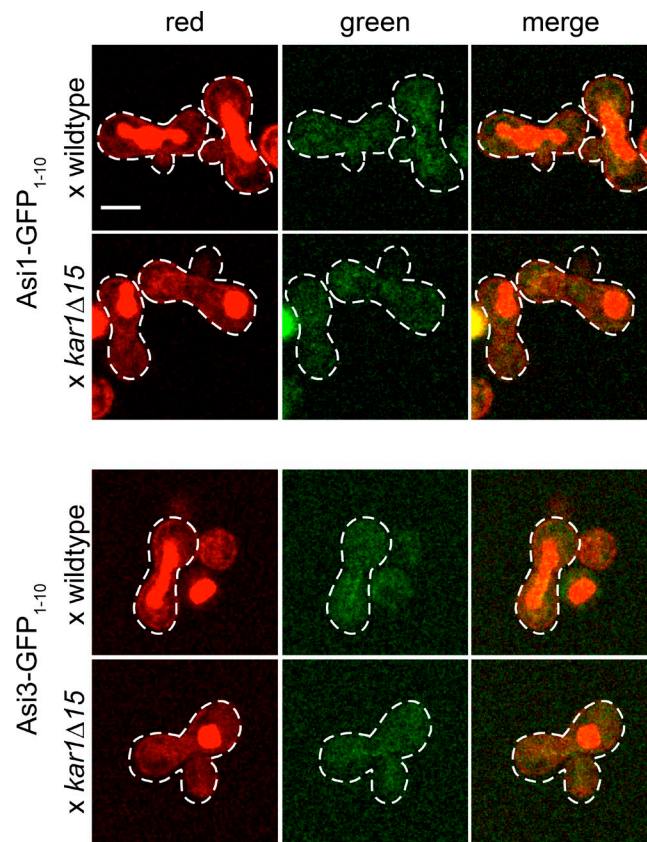

Figure S1. **Karyogamy-defective cells exhibit two distinct nuclei.** Haploid wild-type  $GFP_{111}$ -mCherry-Pus1 or  $kar1\Delta15$   $GFP_{111}$ -mCherry-Pus1 were mated to haploid cells containing a protein fused to  $GFP_{1-10}$  and Sec61-mCherry for 2 h at 23°C. Images of wild-type cells show fused nuclei that contain signal at 488 nm; however, 488-nm signal was not observed in the binucleated  $kar1\Delta15$  cells. Bar, 2  $\mu$ m.

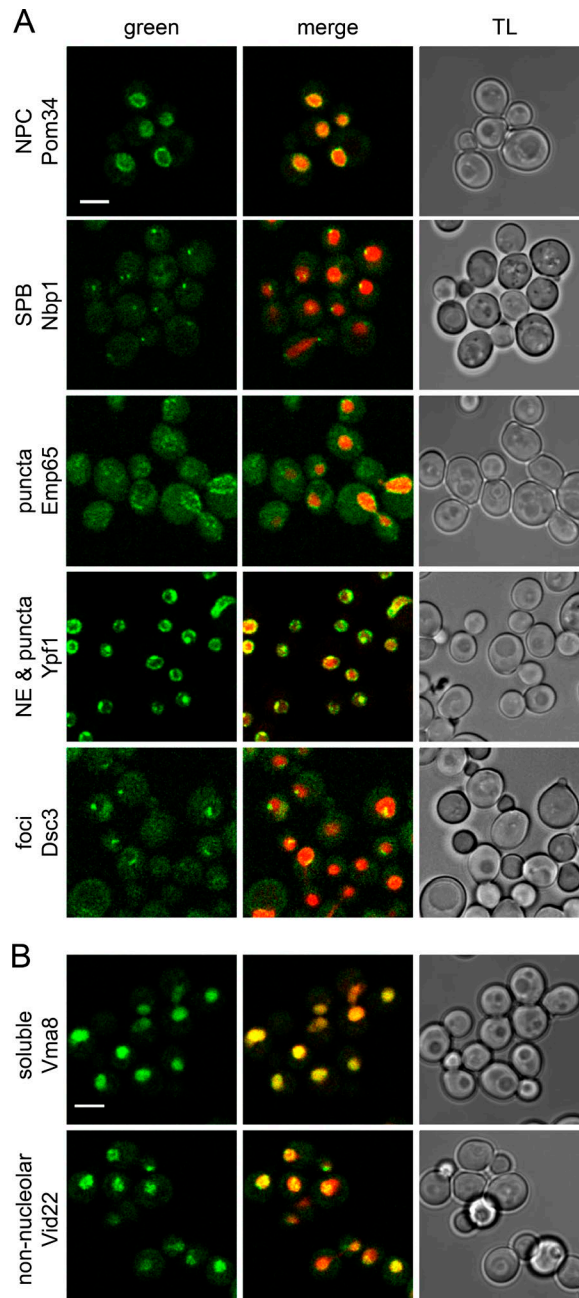

Figure S2. **Split-GFP illustrates other localization phenotypes.** (A) Representative images of subclasses of INM hits. Pom34: Similar to localization seen with GFP (Huh et al., 2003), we found that Pom152, Pom34, and Ndc1 localized to puncta at the NE that we presume are NPCs. Other soluble components of the NPC were not present in our screen, which is a major class of NE hits in the recent reanalysis of the yeast GFP collection (Chong et al., 2015). Nbp1: A single or double focus, depending on the cell-cycle stage, was observed for Nbp1, Ndc1, and Mps3. These represent the SPB, which is embedded in the NE throughout the yeast life cycle (Byers and Goetsch, 1975). Emp65: Sho1, Emp65, Fld1, Yip3, and Yop1 form puncta or foci at the INM, like some of their GFP counterparts (Huh et al., 2003; Friederichs et al., 2012). Similar to Emp65, the INM localization of Chs1, a plasma membrane protein involved in cytokinesis, also showed an uneven punctate pattern that was more visible in some cells. The paralogs Tda7 and YDL211c, both previously localized to the vacuole (Huh et al., 2003), form weak puncta at the INM. Ypf1: This ER protease showed a uniform pattern that also contained a few large foci. The paralogs Lag1 and Lac1 showed a similar pattern, particularly under DNA replication stress (Tkach et al., 2012). Dsc3: This protein showed a single NE-associated focus. Puncta outside the nucleus are caused by signal out of the focal plane shown or autofluorescence. (B) Images of nuclear hits, including a soluble protein present throughout the nucleoplasm (Vma8) and a nonnucleolar distribution (Vid22). Split-GFP is in green; GFP<sub>11</sub>-mCherry-Pus1 is in red. A transmitted light image is also shown. Bars, 2  $\mu$ m.

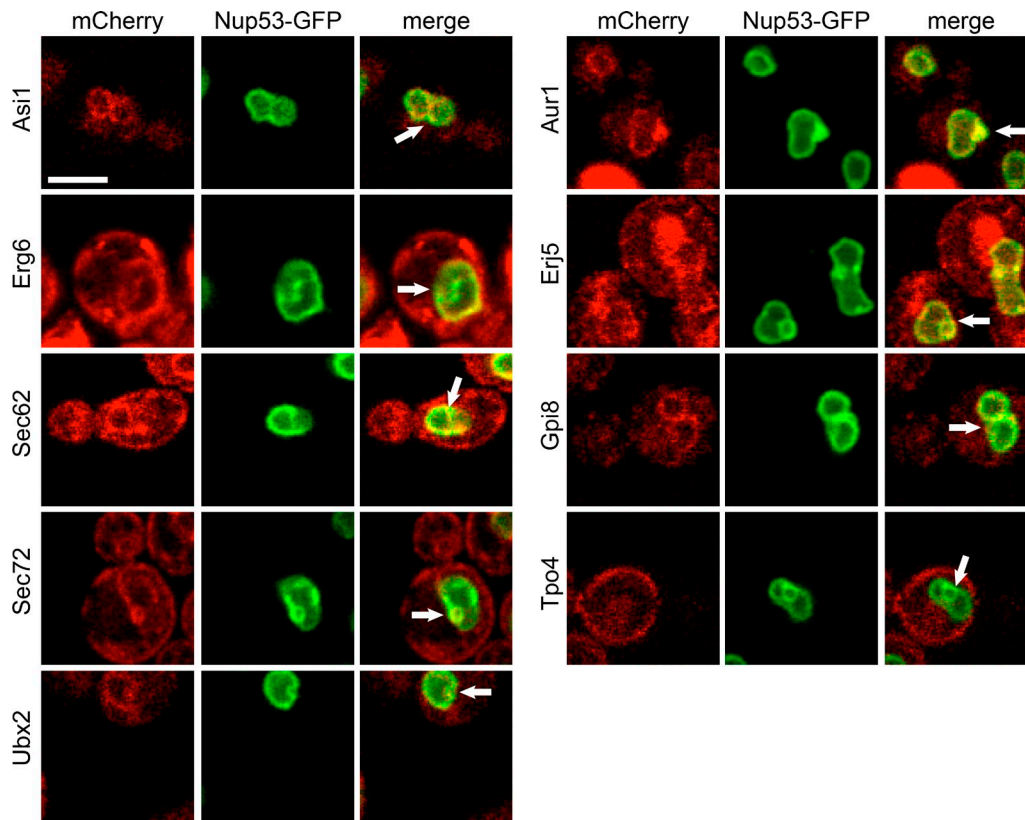

Figure S3. **Theta nuclei verify several low-scoring INM hits.** Single-plane images shown of theta nuclei induced by overexpression of Nup53-GFP (green) in 2% galactose for 5 h at 23°C. Arrows in merge images point to extra inner nuclear lamellae signal, where colocalization of the indicated mCherry-tagged protein was assayed. Example of the known Asi1 INM protein in a theta nucleus (top row), and theta nuclei verification of Erg6, Sec62, Sec72, Ubx2, Aur1 (low INM scores), Erj5 (nonscore), and Gpi8 (high INM score). Sec62, Ubx2, Erj5, and Gpi8 were also verified by immuno-EM (see Fig. 5). Tpo4 was a low-scoring hit that did not verify as an INM hit via the theta nuclei assay (bottom right). Bar, 2  $\mu$ m.

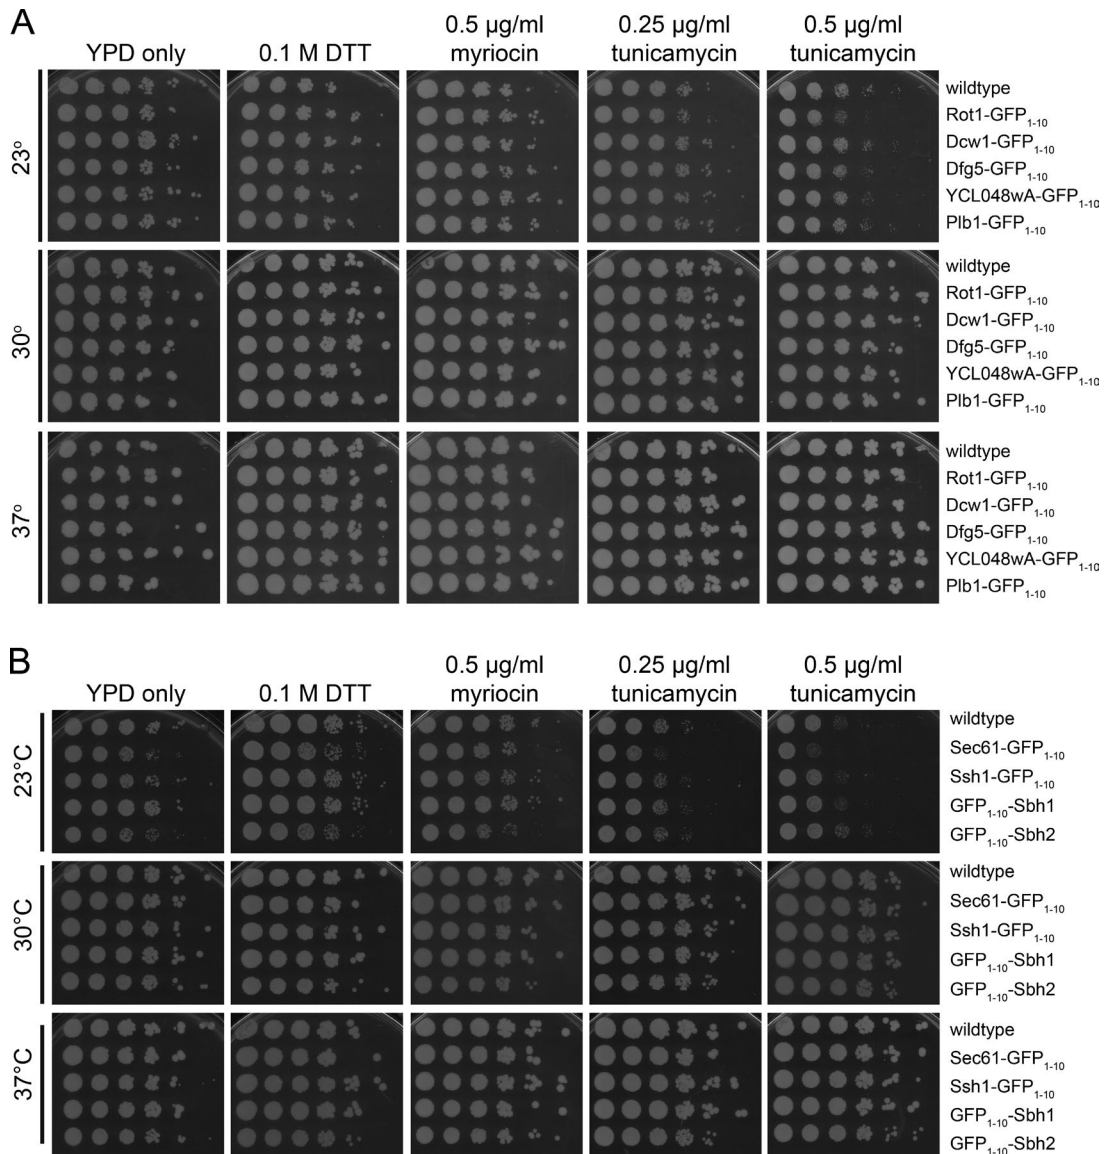

Figure S4. **Growth of selected split-GFP tagged ER-INM hits.** (A) Fivefold serial dilutions of strains containing the indicated C-terminally GFP<sub>1-10</sub> tagged GPI-anchored proteins were grown on YPD alone or with 2.5 mM DTT, 0.5  $\mu$ g/ml myriocin, or 0.25–0.5  $\mu$ g/ml tunicamycin at 23°C, 30°C, and 37°C for 3 d. *ROT1* is an essential gene, the other four are nonessential in yeast. All were hits in our C-terminal screen. (B) Fivefold serial dilutions of strains containing endogenously expressed Sec61-GFP<sub>1-10</sub>, Ssh1-GFP<sub>1-10</sub>, GFP<sub>1-10</sub>-Sbh1, and GFP<sub>1-10</sub>-Sbh2 were grown on YPD alone or with 2.5 mM DTT, 0.5  $\mu$ g/ml myriocin, or 0.25–0.5  $\mu$ g/ml tunicamycin at 23°C, 30°C, and 37°C for 3 d. Sec61-GFP<sub>1-10</sub> exhibited a mild growth defect on tunicamycin at 23°C.

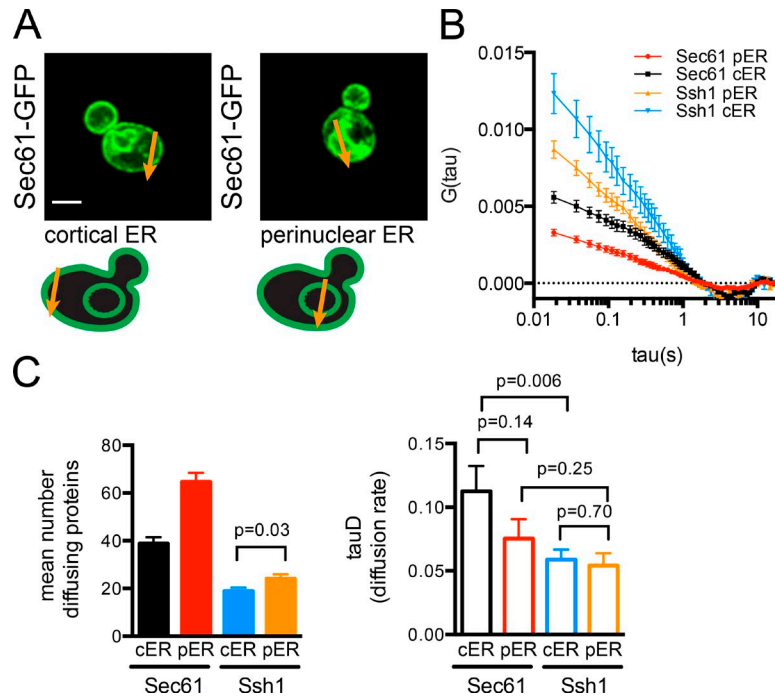

Figure S5. **FCS of Sec61 and Ssh1 reveals different characteristics in the cortical and perinuclear ER.** (A) Focal volumes defined by arrows to include the perinuclear and cortical ER for Sec61-GFP were used to collect linescan data and perform correlation analysis. (B) Mean autocorrelation curves of Sec61 and Ssh1 based on GFP images at the perinuclear ( $n = 28$ , both Sec61 and Ssh1) and cortical ER ( $n = 19$ , Sec61;  $n = 28$ , Ssh1) are shown. (C) For each sample, the diffusion rate and number of diffusing molecules were determined, and mean values are plotted. Bar, 2  $\mu$ m. Error bars indicate SEM. P-values were calculated using the Student's  $t$  test. All values were highly statistically significant ( $P < 0.01$ ) unless noted otherwise.

Table S1. **FCS data for ER translocon proteins**

| Protein/membrane  | Diffusion | SEM Diffusion | $n^a$   | SEM   | Fraction INM | Propagated error |
|-------------------|-----------|---------------|---------|-------|--------------|------------------|
| Sec61 INM         | 0.209     | 0.033         | 20.004  | 1.688 | 0.185        | 0.019            |
| Sec61 NE          | 0.096     | 0.024         | 108.049 | 6.280 |              |                  |
| Sec61 cortical ER | 0.064     | 0.013         | 64.817  | 4.474 |              |                  |
| Sec62 INM         | 0.636     | 0.164         | 4.339   | 0.390 | 0.184        | 0.022            |
| Sec62 NE          | 0.374     | 0.050         | 23.553  | 1.804 |              |                  |
| Sec62 cortical ER | 0.220     | 0.058         | 18.204  | 1.831 |              |                  |
| Sec63 INM         | 0.162     | 1.891         | 7.404   | 1.281 | 0.358        | 0.072            |
| Sec63 NE          | 0.140     | 0.176         | 20.676  | 1.995 |              |                  |
| Sec63 cortical ER | 0.155     | 0.024         | 14.492  | 0.974 |              |                  |
| Sec66 INM         | 0.481     | 0.171         | 7.272   | 0.853 | 0.381        | 0.053            |
| Sec66 NE          | 0.193     | 0.399         | 19.076  | 1.363 |              |                  |
| Sec66 cortical ER | 0.223     | 0.036         | 18.729  | 1.370 |              |                  |
| Sec72 INM         | 0.288     | 0.129         | 7.355   | 0.700 | 0.290        | 0.034            |
| Sec72 NE          | 0.183     | 0.030         | 25.367  | 1.715 |              |                  |
| Sec72 cortical ER | 0.157     | 0.031         | 20.144  | 1.650 |              |                  |
| Ssh1 INM          | 0.051     | 0.009         | 16.602  | 1.113 | 0.412        | 0.042            |
| Ssh1 NE           | 0.133     | 0.028         | 40.284  | 3.055 |              |                  |
| Ssh1 cortical ER  | 0.122     | 0.018         | 31.602  | 2.305 |              |                  |

Diffusion rate reported as micrometer squared per second. Linescanning FCS was performed on cortical and perinuclear ER using GFP-tagged proteins. GFP<sub>1-10</sub> was used to collect INM data.

<sup>a</sup>Mean number of molecules diffusing through focus.



Table S2. Yeast strains used in this study

| Figure                                                                     | Strain number                | Relevant genotype                                                                                                                            |
|----------------------------------------------------------------------------|------------------------------|----------------------------------------------------------------------------------------------------------------------------------------------|
| 1 (B and D), 2, S1                                                         | SLJ7859                      | SLJ1838 pNOP1pr-GFP11-mCherry-PUS1-LEU2 (pSJ1321)                                                                                            |
| 1 B                                                                        | SLJ8349                      | SLJ1838 <i>asi1::ASI1-GFP1-10-URA3MX</i>                                                                                                     |
| 1 B                                                                        | SLJ7859                      | SLJ1838 <i>asi1::ASI1-GFP1-10-URA3MX pNOP1pr-GFP11-mCherry-PUS1-LEU2</i> (pSJ1321)                                                           |
| 1 D, 2                                                                     | SLJ7465                      | SLJ1838 pNOP1pr-GFP11-mCherry-SCS2TM-LEU2 (pSJ1568)                                                                                          |
| 1 D, 2                                                                     | SLJ8344                      | SLJ1838 pNOP1pr-mCherry-SCS2TM-GFP11-LEU2 (pSJ1602)                                                                                          |
| 1 D, 2                                                                     | SLJ1838                      | SLJ1838 pNOP1pr-GFP11-mCherry-HXK1-LEU2 (pSJ1996)                                                                                            |
| 1 D                                                                        | SLJ11810                     | BY4741 pNOP1pr-GFP1-10-SCS2TM (pSJ2039) pNOP1pr-GFP11-mCherry-PUS1-LEU2 (pSJ1321)                                                            |
| 1 D                                                                        | SLJ11812                     | BY4741 pNOP1pr-GFP1-10-SCS2TM (pSJ2039) pNOP1pr-GFP11-mCherry-SCS2TM-LEU2 (pSJ1568)                                                          |
| 1 D                                                                        | SLJ11813                     | BY4741 pNOP1pr-GFP1-10-SCS2TM (pSJ2039) pNOP1pr-mCherry-SCS2TM-GFP11-LEU2 (pSJ1602)                                                          |
| 1 D                                                                        | SLJ11814                     | BY4741 pNOP1pr-GFP1-10-SCS2TM (pSJ2039) pNOP1pr-GFP11-mCherry-HXK1-LEU2 (pSJ1996)                                                            |
| 2, 3 B, 3 C, 6 (A and B), 7 (B, C, and E), 8 B, S2 (A and B), S4 (A and B) | C-terminal split-GFP library | SLJ7859 plus PCR product from pSJ1256                                                                                                        |
| 2, 6B                                                                      | N-terminal split-GFP library | SLJ7859 plus PCR product from pSJ1643 or pSJ1726                                                                                             |
| 3C                                                                         | SLJ9739*                     | <i>sec66Δ::HYGMX sec72::SEC72-GFP1-10-URA3MX pNOP1pr-GFP11-mCherry-PUS1-LEU2</i> (pSJ1321)                                                   |
| 5 (A and B), 6 B, 7 (B, C, and E), S5 A                                    | Yeast GFP collection         | <i>MATa his3Δ1 leu2Δ0 ura3Δ0 met15Δ0 yfg::YFG-HIS3MX</i>                                                                                     |
| 5C                                                                         | SLJ10338                     | W303 <i>sec63::SEC63-mCherry-KANMX ura3::GAL-NUP53-GFP-URA3</i>                                                                              |
| 5C                                                                         | SLJ11379                     | W303 <i>sec66::SEC66-mCherry-KANMX ura3::GAL-NUP53-GFP-URA3</i>                                                                              |
| 5C                                                                         | SLJ11434                     | W303 <i>gpi17::GPI17-mCherry-KANMX ura3::GAL-NUP53-GFP-URA3</i>                                                                              |
| 5C                                                                         | SLJ11384                     | W303 <i>get1::GET1-mCherry-KANMX ura3::GAL-NUP53-GFP-URA3</i>                                                                                |
| 5C                                                                         | SLJ11408                     | W303 <i>yop1::YOP1-mCherry-KANMX ura3::GAL-NUP53-GFP-URA3</i>                                                                                |
| 5C                                                                         | SLJ11383                     | W303 <i>vph1::VPH1-mCherry-KANMX ura3::GAL-NUP53-GFP-URA3</i>                                                                                |
| 7E                                                                         | SLJ9809                      | SLJ7465 <i>sec62::SEC62-GFP1-10-URA3MX</i>                                                                                                   |
| 8C                                                                         | SLJ10163                     | <i>MATa/MATα can1Δ::STE2pr-SpHIS5/CAN1 lyp1Δ/lyp1Δ his3Δ1/his3Δ1 leu2Δ0/leu2Δ0 ura3Δ0/ura3Δ0 met15Δ0/met15Δ0 LYS2/LYS2 trp1Δ::HYGMX/TRP1</i> |
| 8 (C and E), S4 B                                                          | SLJ10954                     | SLJ7859 <i>sbh1::LoxP-GFP1-10-SBH1</i>                                                                                                       |
| 8 C, S4 B                                                                  | SLJ11376                     | SLJ7859 <i>sbh2::LoxP-GFP1-10-SBH2</i>                                                                                                       |
| 8E                                                                         | SLJ10956*                    | <i>sbh2Δ::HYGMX sbh1::LoxP-GFP1-10-SBH1</i>                                                                                                  |
| 8F                                                                         | SLJ10954                     | SLJ7465 <i>sbh1::LoxP-GFP1-10-SBH1</i>                                                                                                       |
| 9B                                                                         | SLJ11340**                   | <i>sbh2::LoxP-GFP-SBH2 sec61::SEC61-mCherry-HYGMX</i>                                                                                        |
| 9B                                                                         | SLJ11010*                    | <i>sbh2::LoxP-GFP1-10-SBH2 sec61::SEC61-mCherry-HYGMX</i>                                                                                    |
| S1                                                                         | SLJ7859kar1Δ15               | SLJ1838 <i>kar1Δ15 pNOP1pr-GFP11-mCherry-PUS1-LEU2</i> (pSJ1321)                                                                             |
| S1                                                                         | SLJ11210*                    | <i>sec61::SEC61-mCherry-KANMX asi3::ASI3-GFP1-10-URA3MX</i>                                                                                  |
| S1                                                                         | SLJ11211*                    | <i>sec61::SEC61-mCherry-KANMX asi1::ASI1-GFP1-10-URA3MX</i>                                                                                  |
| S3                                                                         | SLJ11423                     | W303 <i>asi1::ASI1-mCherry-KANMX ura3::GAL-NUP53-GFP-URA3</i>                                                                                |
| S3                                                                         | SLJ11381                     | W303 <i>erg6::ERG6-mCherry-KANMX ura3::GAL-NUP53-GFP-URA3</i>                                                                                |
| S3                                                                         | SLJ11410                     | W303 <i>sec62::SEC62-mCherry-KANMX ura3::GAL-NUP53-GFP-URA3</i>                                                                              |
| S3                                                                         | SLJ11377                     | W303 <i>sec72::SEC72-mCherry-KANMX ura3::GAL-NUP53-GFP-URA3 LYS+ Matα</i>                                                                    |
| S3                                                                         | SLJ11378                     | W303 <i>ubx2::UBX2-mCherry-KANMX ura3::GAL-NUP53-GFP-URA3</i>                                                                                |
| S3                                                                         | SLJ11444                     | W303 <i>aur1::AUR1-mCherry-KANMX ura3::GAL-NUP53-GFP-URA3</i>                                                                                |
| S3                                                                         | SLJ11443                     | W303 <i>erj5::ERJ5-mCherry-KANMX ura3::GAL-NUP53-GFP-URA3</i>                                                                                |
| S3                                                                         | SLJ11433                     | W303 <i>gpi8::GPI8-mCherry-KANMX ura3::GAL-NUP53-GFP-URA3</i>                                                                                |
| S3                                                                         | SLJ11478                     | W303 <i>tpo4::TPO4-mCherry-KANMX ura3::GAL-NUP53-GFP-URA3</i>                                                                                |
| Base strain                                                                | SLJ1838                      | <i>MATa can1Δ::STE2pr-SpHIS5 lyp1Δ his3Δ1 leu2Δ0 ura3Δ0 met15Δ0 LYS2</i>                                                                     |
| Base strain                                                                | BY4741                       | <i>MATa his3Δ1 leu2Δ0 ura3Δ0 met15Δ0 LYS2</i>                                                                                                |
| Base strain                                                                | W303                         | <i>MATa bar1 leu2-3,112 his3-11,15 lys2 TRP1 ADE2</i>                                                                                        |
| *Generated via cross                                                       | BY4741 × SLJ7859             | <i>MATa can1Δ::STE2pr-SpHIS5 lyp1Δ his3Δ1 leu2Δ0 ura3Δ0 met15Δ0 LYS2 pNOP1pr-GFP11-mCherry-PUS1-LEU2</i> (pSJ1321)                           |
| **Generated via cross/<br>plasmid swap                                     | BY4741 × SLJ7859             | <i>MATa can1Δ::STE2pr-SpHIS5 lyp1Δ his3Δ1 leu2Δ0 ura3Δ0 met15Δ0 LYS2 pNOP1pr-GFP11-PUS1-LEU2</i> (pSJ1679)                                   |

Provided online are three Excel tables. Table S3 shows the results of split-GFP1-10 screen. Table S4 shows proteins that access the yeast INM based on the split-GFP1-10 screen. For predicted single-pass transmembrane proteins (by Phobius and TMHMM), molecular masses of start and end (before and after transmembrane, respectively) are estimated. Table S5 shows contribution of proteins with known C-terminal motifs to our library. It also includes a list of proteins that contain a C-terminal GPI-anchor, tail-anchored, or HDEL or CaaX motifs. Genes included in our library are annotated, as well as the results of screening, when applicable.

## References

- Byers, B., and L. Goetsch. 1975. Behavior of spindles and spindle plaques in the cell cycle and conjugation of *Saccharomyces cerevisiae*. *J. Bacteriol.* 124:511–523.
- Chong, Y.T., J.L. Koh, H. Friesen, S.K. Duffy, M.J. Cox, A. Moses, J. Moffat, C. Boone, and B.J. Andrews. 2015. Yeast proteome dynamics from single cell imaging and automated analysis. *Cell.* 161:1413–1424. <http://dx.doi.org/10.1016/j.cell.2015.04.051>
- Friederichs, J.M., J.M. Gardner, C.J. Smoyer, C.R. Whetstone, M. Gogol, B.D. Slaughter, and S.L. Jaspersen. 2012. Genetic analysis of Mps3 SUN domain mutants in *Saccharomyces cerevisiae* reveals an interaction with the SUN-like protein Slp1. *G3 (Bethesda)*. 2:1703–1718. <http://dx.doi.org/10.1534/g3.112.004614>
- Huh, W.K., J.V. Falvo, L.C. Gerke, A.S. Carroll, R.W. Howson, J.S. Weissman, and E.K. O’Shea. 2003. Global analysis of protein localization in budding yeast. *Nature*. 425:686–691. <http://dx.doi.org/10.1038/nature02026>
- Tkach, J.M., A. Yimit, A.Y. Lee, M. Riffle, M. Costanzo, D. Jaschob, J.A. Hendry, J. Ou, J. Moffat, C. Boone, et al. 2012. Dissecting DNA damage response pathways by analysing protein localization and abundance changes during DNA replication stress. *Nat. Cell Biol.* 14:966–976. <http://dx.doi.org/10.1038/ncb2549>
